# Supplementary material for: Diversity of Chemical Structures and Biosynthesis of Polyphenols in Nut-Bearing Species
Source: Front Plant Sci. 2021 Apr 6;12:642581. doi: 10.3389/fpls.2021.642581 (PMC8056029; doi:10.3389/fpls.2021.642581)
Supplement: Supplementary file 1 [file Table_1.XLSX]

## Sheet: Table S1
Supplementary Table S1. Summary of polyphenolics reported in ten nut plant species.
Group	Compound name	Formula	MW	Mono-isotopic MW	KNApSAcK C_ID	Nut species (Extracted part)	Reference sources
Phenols and phenolic acids
Phenol	alpha-tocopherol	C29H50O2	430	430.381	C00007366	Walnut (Kernel) Pistachio (Kernel) Cashew nut (Testa containing kernel)	Trox et al., 2011 Horvath et al., 2006 Ballistreri et al., 2009
	beta-tocopherol	C28H48O2	416	416.365	C00007364	Walnut (Kernel)	Horvath et al., 2006
	gamma-tocopherol	C28H48O2	416	416.365	C00007365	Walnut (Kernel) Pistachio (Kernel) Cashew nut (Testa containing kernel)	Trox et al., 2011 Horvath et al., 2006 Ballistreri et al., 2009
	delta-tocopherol	C27H46O2	402	402.35	C00007363	Walnut (Kernel)	Horvath et al., 2006
	delta-tocotrienol	C27H40O2	396	396.303	C00035077	Walnut (Kernel)	Horvath et al., 2006
	Coniferyl aldehyde	C10H10O3	178	178.063		Almond (Kernel)	Čolić et al., 2017
	Vanillin	C8H8O3	152	152.047		Chinese chestnut (Kernel)	Xu et al., 2020
	Cardanols					Cashew nut (Kernel)	Bodoira and Maestri, 2020 Trevisan et al., 2006
	Cardols and derivatives (monoene, diene, triene) 2-methylcardol and derivatives (diene,triene)					Cashew nut (Kernel)	Bodoira and Maestri, 2020 Alvarenga et al., 2016 Trevisan et al., 2006
	N-Feruloylaspartic acid	C14H15NO7	309	309.085		Peanut (Skin)	Ma et al., 2014
Polyphenols	5-[(4-Hydroxypheny)ethenyl]-2-(3-methyl-1-butenyl)-1,3-benzenediol	C19H20O3	296	296.141		Peanut (Kernel)	Bisby, 1994
	1,4,8-Trihydroxynaphthaline-1-O-beta-glucoside	C16H18O8	338	338.1		Walnut (Kernel)	Grace et al., 2014
Phenolic acids	Caffeic acid	C9H8O4	180	180.042		Almond (Whole almond, skin, kernel) Chinese chestnut (Kernel) Hazelnut (Kernel, skin) Peanut (Skin) Pecan (Kernel)	Bodoira and Maestri, 2020 Xu et al., 2020 Pelvan et al., 2018 Bodoira et al., 2017 Bolling, 2017 Čolić et al., 2017 Ma et al., 2014 Malik et al., 2009 Shahidi et al., 2007 Alasalvar et al., 2006
	Caffeic acid hexoside	C15H18O9	342	342.095		Pecan (Kernel)	Regueiro et al., 2014 Robbins et al., 2014
	Gallic acid	C7H6O5	170	170.022		Almond (Whole almond, skin) Cashew nut (Kernel, skin) Chinese chestnut (Kernel) Hazelnut (Kernel, skin) Japanese chestnut (Skin) Pecan (Kernel) Pistachio (Kernel, skin) Walnut (Kernel)	Bodoira and Maestri, 2020 Chang et al. 2020 Xu et al., 2020 Salehi et al., 2019 Jia et al., 2018 Pelvan et al., 2018 Vu et al., 2018 Bolling, 2017 Tuyen et al., 2017 Slatnar et al. 2015 Grace et al., 2014 Regueiro et al., 2014 Robbins et al., 2014 Fabani et al., 2013 Del Rio et al., 2011 Ghirardello et al., 2010 Tomaino et al., 2010 Malik et al., 2009 Shahidi et al., 2007 Alasalvar et al., 2006
	Methyl gallate	C8H8O5	184	184.037		Pecan (Kernel)	Jia et al., 2018
	Ethyl gallate	C9H10O5	198	198.053		Pecan (Kernel)	Robbins et al., 2014
	Gallic acid derivatives					Pistachio (Kernel)	Bodoira and Maestri, 2020 Bodoira et al., 2019
	p-hydroxybenzoic acid	C7H6O3	138	138.032		Peanut (Kernel, skin) Almond (Whole almond, skin, kernel) Walnut (Kernel) Japanese chestnut (Kernel, skin) Chinese chestnut (Kernel) Hazelnut (Kernel, skin) Pecan (Kernel)	Bodoira and Maestri, 2020 Xu et al., 2020 Pelvan et al., 2018 Vu et al., 2018 Jia et al., 2018 Bolling, 2017 Čolić et al., 2017 Tuyen et al., 2017 Ma et al., 2014 Robbins et al., 2014 Bolling et al., 2010 Ghirardello et al., 2010 Monagas et al., 2007 Milbury et al., 2006 Bisby, 1994
	5-hydroxybenzoic acid	C7H6O3	138	138.032		Almond (Skin)	Bolling, 2017
	3,4-Dihydroxybenzoic acid	C7H6O4	154	154.027		Peanut (Kernel)	Bisby, 1994
	3,5-Dihydroxybenzoic acid	C7H6O4	154	154.027		Peanut (Kernel)	Bisby, 1994
	2,3,4-trihydroxybenzoic acid	C7H6O5	170	170.022		Chinese chestnut (Kernel)	Xu et al., 2020
	Protocatechuic acid	C7H6O4	154	154.027		Almond (Whole almond, skin, kernel) Hazelnut (Kernel, skin) Japanese chestnut (Kernel, skin) Peanut (Skin)	Bodoira and Maestri, 2020 Xu et al., 2020 Pelvan et al., 2018 Bolling, 2017 Čolić et al., 2017 Tuyen et al., 2017 Ma et al., 2014 Del Rio et al., 2011 Bolling et al., 2010 Ghirardello et al., 2010 Monagas et al., 2007 Milbury et al., 2006
	Protocatechuic acid hexoside					Pecan (Kernel)	Robbins et al., 2014
	Protocatechualdehyde	C7H6O3	138	138.032		Almond (Whole almond, skin) Chinese chestnut (Kernel) Pecan (Kernel)	Xu et al., 2020 Bolling, 2017 Rosa et al., 2011 Monagas et al., 2007
	Vanillic acid	C8H8O4	168	168.042		Almond (Whole almond, skin, kernel) Chinese chestnut (Kernel) Hazelnut (Kernel, skin) Peanut (Kernel) Walnut (Kernel)	Bodoira and Maestri, 2020 Chang et al., 2020 Xu et al., 2020 Pelvan et al., 2018 Vu et al., 2018 Bolling, 2017 Čolić et al., 2017 Ghirardello et al., 2010 Monagas et al., 2007 Milbury et al., 2006 Bisby, 1994
	Chlorogenic acid	C16H18O9	354	354.095		Almond (Whole almond, skin, kernel) Chinese chestnut (Kernel) Hazelnut (Skin) Peanut (Kernel) Pecan (Kernel) Pistachio (Kernel) Walnut (Kernel)	Bodoira and Maestri, 2020 Chang et al., 2020 Xu et al., 2020 Bodoira et al., 2019 Pelvan et al., 2018 Bolling, 2017 Čolić et al., 2017 Ma et al. 2014 Regueiro et al., 2014 Malik et al., 2009 Monagas et al., 2007 Bisby, 1994
	Neochlorogenic acid (5-O-caffeoylquinic acid)	C16H18O9	354	354.095		Walnut (Kernel) Hazelnut (Skin)	Pelvan et al., 2018 Slatnar et al., 2015 Regueiro et al., 2014
	o-coumaric acid	C9H8O3	164	164.047		Peanut (Skin) Almond (Whole almond) Hazelnut (Kernel, skin)	Pelvan et al., 2018 Bolling, 2017 Ma et al., 2014 Ghirardello et al., 2010
	m-coumaric acid	C9H8O3	164	164.047		Pecan (Kernel)	Malik et al., 2009
	p-coumaric acid	C9H8O3	164	164.047		Peanut (Kernel, skin) Almond (Whole almond, skin, kernel) Walnut (Kernel) Japanese chestnut (Kernel, skin) Chinese chestnut (Kernel) Cashew nut (Kernel, skin) Hazelnut (Kernel, skin)	Bodoira and Maestri, 2020 Xu et al., 2020 Salehi et al., 2019 Vu et al., 2018 Bolling, 2017 Čolić et al., 2017 Tuyen et al., 2017 Slatnar et al. 2015 Ma et al. 2014 Ghirardello et al., 2010 Monagas et al., 2007 Shahidi et al., 2007 Alasalvar et al., 2006 Bisby, 1994
	Phloretic acid	C9H10O3	166	166.063		Peanut (Kernel)	Bisby, 1994
	Ferulic acid	C10H10O4	194	194.058		Almond (Whole almond, kernel) Walnut (Kernel) Japanese chestnut (Kernel) Chinese chestnut (Kernel) Hazelnut (Kernel, skin)	Bodoira and Maestri, 2020 Chang et al., 2020 Xu et al., 2020 Pelvan et al., 2018 Vu et al., 2018 Bolling, 2017 Čolić et al., 2017 Tuyen et al., 2017 Slatnar et al. 2015 Shahidi et al., 2007 Alasalvar et al., 2006
	Sinapic acid	C11H12O5	224	224.068		Almond (Kernel) Japanese chestnut (Kernel) Chinese chestnut (Kernel) Hazelnut (Kernel, skin)	Bodoira and Maestri, 2020 Xu et al., 2020 Pelvan et al., 2018 Čolić et al., 2017 Tuyen et al., 2017 Ghirardello et al., 2010 Shahidi et al., 2007 Alasalvar et al., 2006
	Ellagic acid	C14H6O8	302	302.006		Almond (Kernel) Walnut (Kernel) Pecan (Kernel) Japanese chestnut (Skin) Hazelnut (Skin)	Bodoira and Maestri, 2020 Jia et al., 2018 Pelvan et al., 2018 Vu et al., 2018 Čolić et al., 2017 Tuyen et al., 2017 Regueiro et al., 2014 Robbins et al., 2014 Slatnar et al. 2015 Grace et al., 2014 Malik et al., 2009
	Syringic acid	C9H10O5	198	198.053		Walnut (Kernel) Chinese chestnut (Kernel) Cashew nut (Kernel, skin) Hazelnut (Kernel, skin)	Bodoira and Maestri, 2020 Chang et al., 2020 Xu et al., 2020 Salehi et al., 2019 Pelvan et al., 2018 Vu et al., 2018 Ghirardello et al., 2010
	Gentistic acid	C7H6O4	154	154.027		Chinese chestnut (Kernel)	Xu et al., 2020
	Salicylic acid	C7H6O3	138	138.032		Hazelnut (Skin)	Pelvan et al., 2018
	Coutaric acid	C13H12O8	296	296.053		Peanut (Skin) Hazelnut (Skin)	Pelvan et al., 2018 Ma et al., 2014
	Fertaric acid	C14H14O9	326	326.064		Peanut (Skin) Hazelnut (Skin)	Pelvan et al., 2018 Ma et al., 2014
	3-p-coumaroylquinic acid	C16H18O8	338	338.1		Hazelnut (Skin) Walnut (Kernel)	Pelvan et al., 2018 Regueiro et al., 2014
	4-p-coumaroylquinic acid	C16H18O8	338	338.1		Walnut (Kernel)	Regueiro et al., 2014
	4-O-cafferoylferulic acid	C16H18O9	354	354.095		Peanut (Skin)	Ma et al., 2014
	Caftaric acid	C13H12O9	312	312.048		Peanut (Skin)	Ma et al., 2014
	Chicoric acid	C22H18O12	474	474.08		Peanut (Skin)	Ma et al., 2014
	p-coumaroyl-p-hydroxybenzoyltartaric acid					Peanut (Skin)	Ma et al., 2014
	p-coumaroylcaffeoyltartaric acid					Peanut (Skin)	Ma et al., 2014
	p-coumaroylvanilloyltartaric acid					Peanut (Skin)	Ma et al., 2014
	p-coumaroylsinapoyltartaric acid					Peanut (Skin)	Ma et al., 2014
	di-p-coumaroyltartaric acid					Peanut (Skin)	Ma et al., 2014
	p-coumaroylferuloyltartaric acid					Peanut (Skin)	Ma et al., 2014
	Feruloylsinapoyltartaric acid					Peanut (Skin)	Ma et al., 2014
	Feruloylcaffeoyltartaric acid					Peanut (Skin)	Ma et al., 2014
	Anacardic acid and derivatives (e.g. diene, triene)					Pistachio (Kernel) Cashew nut (Kernel)	Bodoira and Maestri, 2020 Bodoira et al., 2019 Salehi et al., 2019 Alvarenga et al., 2016 Trevisan et al., 2006
Stilbenoids	Resveratrol	C14H12O3	228	228.079		Peanut (Skin) Almond (Whole almond, skin, kernel) Pistachio (Kernel)	Bodoira and Maestri, 2020 Čolić et al., 2017 Ma et al., 2014 Xie and Bolling, 2014 Ballard et al. 2010 Ballistreri et al., 2009
	4-(3-Methyl-1-butenyl)-3,3',4',5-tetrahydroxystilbene (Arachidin I)	C19H20O4	312	312.136		Peanut (Kernel)	Bisby, 1994
	4-prenylresveratrol (Arachidin II)	C19H20O3	296	296.141		Peanut (Kernel)	Bisby, 1994
	Polydatin/Piceid (resveratrol-3-β-glucoside)	C20H22O8	390	390.131		Almond (Whole almond)	Bodoira and Maestri, 2020 Bolling, 2017 Xie and Bolling, 2014
	Piceid-6"-p-coumaroyltartaric acid					Peanut (Skin)	Ma et al., 2014
	Resveratrol-3-O-p-coumaroyltartaric acid					Peanut (Skin)	Ma et al., 2014
	Piceatannol	C14H12O4	244	244.074		Almond (Whole almond)	Bodoira and Maestri, 2020 Bolling, 2017 Ma et al., 2014 Xie and Bolling, 2014
	Oxyresveratrol	C14H12O4	244	244.074		Almond (Whole almond)	Bodoira and Maestri, 2020 Bolling, 2017 Xie and Bolling, 2014
	Pterostilbene	C16H16O3	256	256.11		Almond (Whole almond)	Xie and Bolling, 2014
Flavonoids
Flavanol	(+)-Catechin	C15H14O6	290	290.079		Peanut (Skin) Almond (Whole almond, skin, kernel) Pistachio (Kernel, skin) Walnut (Kernel) Pecan (Kernel) Chinese chestnut (Kernel) Cashew nut (Kernel, skin) Hazelnut (Skin)	Bodoira and Maestri, 2020 Zhang et al., 2020 Salehi et al., 2019 Jia et al., 2018 Vu et al., 2018 Bolling, 2017 Čolić et al., 2017 Bodoira et al., 2017 Slatnar et al. 2015 Valdés et al., 2015 Fabani et al., 2013 Grace et al., 2014 Ma et al., 2014 Regueiro et al., 2014 Robbins et al., 2014 Sarnoski et al., 2012 Del Rio et al., 2011 Trox et al., 2011 Bolling et al., 2010 Tomaino et al., 2010 Malik …
	Catechin hexoside	C21H24O11	452	452.132		Pecan (Kernel)	Jia et al., 2018
	(–)-Epicatechin	C15H14O6	290	290.079		Peanut (Skin) Almond (Whole almond, skin, kernel) Pistachio (Kernel, skin) Pecan (Kernel) Cashew nut (Skin) Hazelnut (Skin) Walnut (Kernel)	Bodoira and Maestri, 2020 Jia et al., 2018 Bolling, 2017 Bodoira et al., 2017 Valdés et al., 2015 Ma et al., 2014 Regueiro et al., 2014 Fabani et al., 2013 Sarnoski et al., 2012 Del Rio et al., 2011 Trox et al., 2011 Bolling et al., 2010 Tomaino et al., 2010 Malik et al., 2009 Monagas et al., 2007 Milbury et al., 2006
	Epicatechin 3-O-gallate	C22H18O10	442	442.09		Almond (Whole almond) Walnut (Kernel) Chinese chestnut (Kernel) Hazelnut (Skin) Pecan (Kernel)	Bodoira and Maestri, 2020 Zhang et al., 2020 Jia et al., 2018 Pelvan et al., 2018 Vu et al., 2018 Bolling, 2017 Regueiro et al., 2014 Robbins et al., 2014 Del Rio et al., 2011
	Gallocatechin gallate	C22H18O11	458	458.085		Almond (Whole almond) Pecan (Kernel)	Bolling, 2017 Robbins et al., 2014
	Epigallocatechin	C15H10O7	302	302.043		Cashew nut (Kernel, skin) Pecan (Kernel)	Salehi et al., 2019 Robbins et al., 2014 Rosa et al., 2011
	Epigallocatechin gallate	C22H18O11	458	458.085		Pecan (Kernel)	Robbins et al., 2014 Jia et al., 2018
Flavone	Luteolin	C15H10O6	286	286.048		Peanut (Skin) Almond (Kernel) Pistachio (Kernel, skin) Chinese chestnut (Kernel)	Bodoira and Maestri, 2020 Zhang et al., 2020 Bodoira et al., 2017 Čolić et al., 2017 Ma et al., 2014 Fabani et al., 2013 Ballistreri et al., 2009
	Diosmetin	‎C16H12O6	300	300.063		Peanut (Skin)	Bodoira et al., 2017 Ma et al., 2014
	Apigenin	C15H10O5	270	270.053		Almond (Kernel) Pistachio (Kernel) Japanese chestnut (Skin)	Bodoira and Maestri, 2020 Čolić et al., 2017 Tuyen et al., 2017 Tomaino et al., 2010
	Apiin	C26H28O14	564	564.148		Chinese chestnut (Kernel)	Zhang et al., 2020
	Chrysin	C15H10O4	254	254.058		Peanut (Skin) Almond (Kernel)	Bodoira et al., 2017 Čolić et al., 2017
	Cynaroside (Luteolin 7-O-glucoside)	C21H20O11	448	448.101		Almond (Kernel)	Čolić et al., 2017
	Cirsiliol	C17H14O7	330	330.074		Peanut (Skin)	Ma et al., 2014
	Dihydrorobinetin 7,3'-dimethyl ether					Peanut (Skin)	Ma et al., 2014
Flavonol	Rhamnetin	C16H12O7	316	316.058		Chinese chestnut (Kernel)	Zhang et al., 2020
	Isorhamnetin	C16H12O7	316	316.058		Peanut (Skin) Almond (Whole almond, skin, kernel)	Bolling, 2017 Bodoira et al., 2017 Ma et al., 2014 Bolling et al., 2010 Monagas et al., 2007 Milbury et al., 2006
	Isorhamnetin acetyl-glucoside					Peanut (Skin)	Ma et al., 2014
	Isorhamnetin-3-O-galactoside	C22H22O12	478	478.111		Almond (Whole almond, skin, kernel)	Bolling, 2017 Milbury et al., 2006
	Isorhamnetin-3-O-glucoside	C22H22O12	478	478.111		Almond (Whole almond, skin, kernel)	Bolling, 2017 Valdés et al., 2015 Bolling et al., 2010 Monagas et al., 2007 Milbury et al., 2006
	Narcissin (Isorhamnetin-3-O-rutinoside)	C28H32O16	624	624.169		Almond (Whole almond, skin, kernel) Hazelnut (Skin)	Bodoira and Maestri, 2020 Pelvan et al., 2018 Bolling, 2017 Valdés et al., 2015 Del Rio et al., 2011 Bolling et al., 2010 Monagas et al., 2007 Milbury et al., 2006
	Kaempferol	C15H10O6	286	286.048		Almond (Whole almond, skin, kernel) Pistachio (Skin) Chinese chestnut (Kernel)	Zhang et al., 2020 Bolling, 2017 Čolić et al., 2017 Bolling et al., 2010 Tomaino et al., 2010 Monagas et al., 2007 Milbury et al., 2006
	Kaempferol-3-O-galactoside	C21H20O11	448	448.101		Almond (Whole almond, skin, kernel)	Bodoira and Maestri, 2020 Bolling, 2017 Bolling et al., 2010 Milbury et al., 2006
	Astragalin (Kaempferol-3-O-glucoside)	C21H20O11	448	448.101		Almond (Whole almond, skin, kernel) Hazelnut (Skin)	Bodoira and Maestri, 2020 Pelvan et al., 2018 Bolling, 2017 Čolić et al., 2017 Bolling et al., 2010 Monagas et al., 2007
	Kaempferol-3-O-rutinoside	C27H30O15	594	594.158		Almond (Whole almond, skin, kernel)	Bodoira and Maestri, 2020 Bolling, 2017 Valdés et al., 2015 Bolling et al., 2010 Monagas et al., 2007 Milbury et al., 2006
	Kaempferol rhamonoside					Hazelnut (Skin)	Del Rio et al., 2011
	Quercetin	C15H10O7	302	302.043		Peanut (Skin) Almond (Whole almond, skin) Pistachio (Kernel, skin) Chinese chestnut (Kernel) Hazelnut (Skin) Walnut (Kernel)	Bodoira and Maestri, 2020 Chang et al., 2020 Pelvan et al., 2018 Bolling, 2017 Bodoira et al., 2017 Ma et al., 2014 Regueiro et al., 2014 Fabani et al., 2013 Del Rio et al., 2011 Bolling et al., 2010 Tomaino et al., 2010 Ballistreri et al., 2009 Monagas et al., 2007 Milbury et al., 2006
	Rutin (Quercetin-3-O-rutinoside)	C27H30O16	610	610.153		Almond (Whole almond, skin, kernel) Pistachio (Kernel, skin) Walnut (Kernel) Chinese chestnut (Kernel) Hazelnut (Skin)	Bodoira and Maestri, 2020 Zhang et al., 2020 Vu et al., 2018 Bolling, 2017 Čolić et al., 2017 Valdés et al., 2015 Del Rio et al., 2011 Bolling et al., 2010 Tomaino et al., 2010 Milbury et al., 2006
	Hyperoside (Quercetin-3-O-galactoside)	C21H20O12	464	464.095		Almond (Whole almond, skin, kernel) Chinese chestnut (Kernel)	Zhang et al., 2020 Bolling, 2017 Čolić et al., 2017 Bolling et al., 2010 Milbury et al., 2006
	Isoquercitrin (Quercetin 3-O-glucoside)	C21H20O12	464	464.095		Almond (Whole almond, skin) Pistachio (Kernel, skin) Walnut (Kernel) Hazelnut (Skin)	Bodoira and Maestri, 2020 Bodoira et al., 2019 Pelvan et al., 2018 Vu et al., 2018 Bolling, 2017 Slatnar et al., 2015 Fabani et al., 2013 Monagas et al., 2007 Milbury et al., 2006
	Quercitrin (Quercetin 3-O-rhamnoside)	C21H20O11	448	448.101		Chinese chestnut (Kernel) Hazelnut (Skin)	Chang et al., 2020 Del Rio et al., 2011
	Quercetin glucuronide	C21H18O13	478	478.075		Peanut (Skin) Hazelnut (Skin)	Pelvan et al., 2018 Ma et al., 2014
	Quercetin galloylhexoside	C28H24O16	616	616.106		Walnut (Kernel)	Regueiro et al., 2014
	Quercetin pentoside	C20H18O11	434	434.085		Walnut (Kernel)	Regueiro et al., 2014
	Quercetin hexoside	C21H20O12	464	464.095		Walnut (Kernel)	Regueiro et al., 2014
	Dihydroquercetin 3',4'-dimethyl ester					Peanut (Skin)	Ma et al., 2014
	Galangin	C15H10O5	270	270.053		Almond (Kernel)	Čolić et al., 2017
	6,8-dihydroxykaempferol	C15H10O8	318	318.038		Almond (Skin)	Bolling et al., 2010 Milbury et al., 2006
	Myricetin	C15H10O8	318	318.038		Pistachio (Kernel, skin) Hazelnut (Skin)	Fabani et al., 2013 Del Rio et al., 2011
	Myricetin rhamnoside					Hazelnut (Skin)	Del Rio et al., 2011
	Morin	C15H10O7	302	302.043		Japanese chestnut (Skin)	Tuyen et al., 2017
Flavanone	Eriodictyol	C15H12O6	288	288.063		Peanut (Skin) Almond (Whole almond, skin) Pistachio (Kernel, skin) Chinese chestnut (Kernel) Hazelnut (Skin)	Bodoira and Maestri, 2020 Zhang et al., 2020 Pelvan et al., 2018 Bolling, 2017 Ma et al., 2014 Fabani et al., 2013 Bolling et al., 2010 Tomaino et al., 2010 Ballistreri et al., 2009 Monagas et al., 2007 Milbury et al., 2006
	Eriodictyol-7-O-glucoside	C21H22O11	450	450.116		Almond (Skin) Pistachio (Kernel, skin)	Bodoira and Maestri, 2020 Bolling, 2017 Tomaino et al., 2010 Monagas et al., 2007
	Homoeriodictyol					Peanut (Skin)	Ma et al., 2014
	Biflavonoids [Eriodictyol -> C-methyl Robinetinidol]					Peanut (Skin)	Ma et al., 2014
	Biflavonoids [homoeriodictyol C3 -> eriodictyol C8]					Peanut (Skin)	Ma et al., 2014
	Naringenin	C15H12O5	272	272.068		Almond (Whole almond, skin, kernel) Pistachio (Kernel, skin)	Bodoira and Maestri, 2020 Bodoira et al., 2019 Bolling, 2017 Čolić et al., 2017 Valdés et al., 2015 Fabani et al., 2013 Bolling et al., 2010 Tomaino et al., 2010 Ballistreri et al., 2009 Monagas et al., 2007 Milbury et al., 2006
	Naringenin-7-O-glucoside	C21H22O10	434	434.121		Almond (Whole almond, skin, kernel)	Bodoira and Maestri, 2020 Bolling, 2017 Valdés et al., 2015 Bolling et al.2010 Monagas et al., 2007 Milbury et al., 2006
	Naringin (Naringenin-7-O–neohesperidoside)	C27H32O14	580	580.179		Almond (Kernel) Pistachio (Kernel, skin) Walnut (Kernel) Chinese chestnut (Kernel)	Zhang et al., 2020 Vu et al., 2018 Čolić et al., 2017 Tomaino et al., 2010
	Morelloflavone [Naringenin (C3) -> Luteolin (C8)					Peanut (Skin)	Ma et al., 2014
	Pinocembrin	C15H12O4	256	256.074		Almond (Kernel)	Čolić et al., 2017
Flavanonol	Aromadendrin (dihydrokaempferol)	C15H12O6	288	288.063		Almond (Whole almond, skin)	Bolling, 2017
	Taxifolin (dihydroquercetin)	C15H12O7	304	304.058		Almond (Whole almond, skin)	Bolling, 2017 Monagas et al., 2007
Isoflavone	Genistein	C15H10O5	270	270.053		Almond (Whole almond) Pistachio (Kernel)	Bodoira and Maestri, 2020 Bolling, 2017 Tomaino et al., 2010 Ballistreri et al., 2009
	Genistin (Genistein-7-O-glucoside)	C21H20O10	432	432.106		Pistachio (Kernel)	Bodoira et al., 2019 Tomaino et al., 2010 Ballistreri et al., 2009
	Daidzein	C15H10O4	254	254.058		Almond (Whole almond) Pistachio (Kernel)	Bodoira and Maestri, 2020 Bodoira et al., 2019 Bolling, 2017 Tomaino et al., 2010 Ballistreri et al., 2009
	Daidzin	C21H20O9	416	416.111		Pistachio (Kernel)	Bodoira and Maestri, 2020 Ballistreri et al., 2009
	5,7-Dimethoxyisoflavone	C17H14O4	282	282.089		Peanut (Kernel)	Bisby, 1994
	Biochanin A	C16H12O5	284	284.068		Peanut (Skin) Almond (Whole almond)	Bodoira et al., 2017 Bolling, 2017 Ma et al., 2014
	Formononetin	C16H12O4	268	268.074		Almond (Whole almond)	Bolling, 2017
	Formononetin-7-O-p-coumaroyltartaric acid					Peanut (Skin)	Ma et al., 2014
	Glycitein	C16H12O5	284	284.068		Almond (Whole almond)	Bolling, 2017
	3′5,7-trihydroxyisoflavone-4-methoxy-3 -O-β-glucopyranoside					Peanut (Skin)	Bodoira et al., 2017 Ma et al., 2014
Anthocyanidins	Ideain (Cyanidin 3-O-galactoside)	C21H21O11+	449	449.108		Pistachio (Kernel, skin)	Bodoira and Maestri, 2020 Fabani et al., 2013 Tomaino et al., 2010 Ballistreri et al., 2009
	Cyanidin-3-O-glucoside	C21H21O11+	449	449.108		Pistachio (Kernel, skin)	Bodoira and Maestri, 2020 Fabani et al., 2013 Tomaino et al., 2010 Ballistreri et al., 2009
	Cyanidin	C15H11O6+	287	287.056		Almond (Whole almond)	Bolling, 2017
Dihydrochalcones	Phlorizin (Phloretin 2'-O-glucoside)	C21H24O10	436	436.137		Almond (Kernel) Hazelnut (Skin)	Čolić et al., 2017 Del Rio et al., 2011
	Phloretin	C15H14O5	274	274.084		Almond (Kernel)	Čolić et al., 2017
Tannins	Ellagitannins					Almond (Whole almond)	Bolling, 2017
	Gallotannins					Almond (Whole almond)	Bolling, 2017
	Strictinin	C27H22O18	634	634.081	C00035393	Walnut (Kernel) Pecan (Kernel)	Jia et al., 2018 Grace et al., 2014 Regueiro et al., 2014 Fukuda et al., 2003
	Isostrictinin	C27H22O18	634	634.081		Walnut (Kernel)	Grace et al., 2014 Fukuda et al., 2003
	Pedunculagin	C34H24O22	784	784.076	C00002932	Walnut (Kernel) Pecan (Kernel)	Jia et al., 2018 Grace et al., 2014 Regueiro et al., 2014 Fukuda et al., 2003
	Tellimagrandin I	C34H26O22	786	786.091	C00002938	Walnut (Kernel) Pecan (Kernel)	Jia et al., 2018 Grace et al., 2014 Regueiro et al., 2014 Fukuda et al., 2003
	Tellimagrandin II	C41H30O26	938	938.102		Walnut (Kernel)	Grace et al., 2014 Regueiro et al., 2014 Fukuda et al., 2003
	Glansrin A	N/A				Walnut (Kernel)	Fukuda et al., 2003
	Glansrin B	C40H26O25	906	906.076		Walnut (Kernel)	Regueiro et al., 2014 Fukuda et al., 2003
	Glansrin C	C41H26O26	934	934.071		Walnut (Kernel)	Regueiro et al., 2014 Fukuda et al., 2003
	Glansrin D	C75H52O48	1720	1720.16		Walnut (Kernel)	Regueiro et al., 2014
	HHDP-glucose isomers	C20H18O14	482	482.07		Walnut (Kernel) Pecan (Kernel)	Jia et al., 2018 Regueiro et al., 2014 Robbins et al., 2014
	2,3-O-(S)-hexahydroxydiphenoyl-D-glucopyranose	C20H18O14	482	482.07		Walnut (Kernel)	Grace et al., 2014 Fukuda et al., 2003
	1,2-di-O-galloyl-4,6-O-(S)-hexahydroxydiphenoyl-beta-D-glucopyranose	C34H26O22	786	786.091		Walnut (Kernel)	Fukuda et al., 2003
	Casuarictin	C41H28O26	936	936.087		Walnut (Kernel)	Grace et al., 2014 Fukuda et al., 2003
	Rugosin C	C47H32O30	1076	1076.1		Walnut (Kernel)	Fukuda et al., 2003 Regueiro et al., 2014
	Rugosin F	C82H56O52	1872	1872.17		Walnut (Kernel)	Regueiro et al., 2014
	Casuarinin	C41H28O26	936	936.087		Walnut (Kernel)	Regueiro et al., 2014 Fukuda et al., 2003
	Stenophyllanin A	C56H40O31	1208	1208.16		Walnut (Kernel)	Fukuda et al., 2003
	Stachyuranin B	C49H38O28	1074	1074.15		Walnut (Kernel)	Fukuda et al., 2003
	Praecoxin A (HHDP-valoneoyl-glucose)	C41H28O27	952	952.082		Walnut (Kernel) Pecan (Kernel)	Jia et al., 2018 Regueiro et al., 2014 Fukuda et al., 2003
	Praecoxin A methyl ester	C42H30O27	966	966.097		Walnut (Kernel)	Grace et al., 2014
	Praecoxin D	C41H26O26	934	934.071		Walnut (Kernel)	Grace et al., 2014
	1,3,6-Trigalloyl glucose	C27H24O18	636	636.096		Walnut (Kernel)	Vu et al., 2018
	Penta-O-galloyl-β-D-glucose	C41H32O26	940	940.118		Walnut (Kernel)	Vu et al., 2018
	Prodelphinidin (dimer, trimer)					Hazelnut (Skin)	Del Rio et al., 2011
	Valoneic acid dilactone	C21H10O13	470	470.012		Hazelnut (Skin) Walnut (Kernel) Pecan (Kernel)	Pelvan et al., 2018 Regueiro et al., 2014 Rosa et al., 2011
	Valoneic acid dilactone hydrate	C21H12O14	488	488.023		Pecan (Kernel)	Jia et al., 2018 Robbins et al., 2014
	Flavogallonic acid dilactone isomer	C21H10O13	470	470.012		Walnut (Kernel)	Regueiro et al., 2014
	Oenothein B	C68H48O44	1568	1568.15		Walnut (Kernel)	Regueiro et al., 2014
	Eucalbanin A	C48H30O30	1086	1086.08		Walnut (Kernel)	Regueiro et al., 2014
	Gallic acid hexoside	C13H16O10	332	332.074		Pecan (Kernel)	Jia et al., 2018 Robbins et al., 2014
	Ellagic acid rutinoside	C26H26O17	610	610.117		Pecan (Kernel)	Jia et al., 2018
	Ellagic acid rhamnoside	C20H16O12	448	448.064		Pecan (Kernel)	Jia et al., 2018 Rosa et al., 2011
	Ellagic acid 4-O-xyloside	C19H14O12	434	434.048		Walnut (Kernel)	Grace et al., 2014
	Ellagic acid hexoside	C20H16O13	464	464.059		Walnut (Kernel) Pecan (Kernel)	Jia et al., 2018 Regueiro et al., 2014 Robbins et al., 2014
	Methyl ellagic acid	C15H8O8	316	316.022		Pecan (Kernel)	Jia et al., 2018 Rosa et al., 2011
	Methyl ellagic acid pentose	C20H16O12	448	448.064		Pecan (Kernel)	Jia et al., 2018 Robbins et al., 2014
	Methyl ellagic acid galloyl pentose	C27H20O16	600	600.075		Pecan (Kernel)	Jia et al., 2018 Robbins et al., 2014
	Methyl ellagic acid hexoside	C21H18O13	478	478.075		Pecan (Kernel)	Jia et al., 2018 Robbins et al., 2014
	dimethyl ellagic acid	C16H10O8	330	330.038		Pecan (Kernel)	Jia et al., 2018 Robbins et al., 2014
	dimethyl ellagic acid pentose					Pecan (Kernel)	Robbins et al., 2014
	dimethyl ellagic acid hexoside	C22H20O13	492	492.09		Pecan (Kernel)	Jia et al., 2018 Robbins et al., 2014
	Ellagic acid pentoside	C19H14O12	434	434.048		Walnut (Kernel) Pecan (Kernel)	Jia et al., 2018 Regueiro et al., 2014 Robbins et al., 2014 Rosa et al., 2011
	Ellagic acid HHDP glucose					Pecan (Kernel)	Robbins et al., 2014
	Ellagic acid galloyl pentose	C26H18O16	586	586.059		Pecan (Kernel)	Jia et al., 2018 Robbins et al., 2014
	Digalloyl ellagic acid	C28H24O16	616	616.106		Pecan (Kernel)	Jia et al., 2018 Robbins et al., 2014
	Monogalloyl glucose	C13H16O10	332	332.074		Walnut (Kernel) Pecan (Kernel)	Regueiro et al., 2014 Rosa et al., 2011
	digalloyl glucose	C20H20O14	484	484.085		Walnut (Kernel) Pecan (Kernel)	Jia et al., 2018 Regueiro et al., 2014
	trigalloyl glucose	C27H24O18	636	636.096		Walnut (Kernel)	Regueiro et al., 2014
	tetragalloyl glucose	C34H28O22	788	788.107		Walnut (Kernel)	Regueiro et al., 2014
	1,2,3,4,6-pentagalloyl glucose	C41H32O26	940	940.118		Walnut (Kernel)	Regueiro et al., 2014
	Proanthocyanidin A1	C30H24O12	576	576.127	C00009277	Peanut (Skin)	Lou et al., 1999
	Proanthocyanidin A2	C30H24O12	576	576.127	C00002934	Peanut (Skin)	Lou et al., 1999
	Proanthocyanidin dimers (A,B-types)					Peanut (Skin) Almond (Whole almond) Pecan (Kernel)	Bodoira and Maestri, 2020 Bodoira et al., 2017 Bolling, 2017 Robbins et al., 2014 Yu et al., 2006
	Proanthocyanidin trimers (A,B-types)					Peanut (Skin) Almond (Whole almond)	Bodoira and Maestri, 2020 Bolling, 2017 Yu et al., 2006
	Proanthocyanidin tetramers (A,B-types)					Peanut (Skin) Almond (Skin)	Bodoira and Maestri, 2020 Yu et al., 2006
	Proanthocyanidin oligomers					Almond (Whole almond)	Bolling, 2017
	Procyanidin B1	C30H26O12	578	578.142		Almond (Whole almond, skin)	Bolling, 2017 Monagas et al., 2007
	Procyanidin B2	C30H26O12	578	578.142	C00009077	Peanut (N/A) Almond (Whole almond, skin) Walnut (Kernel)	Bolling, 2017 Slatnar et al. 2015 Grace et al., 2014 Monagas et al., 2007 Lou et al., 2004
	Procyanidin B3	C30H26O12	578	578.142	C00009071	Peanut (N/A) Almond (Whole almond, skin)	Bolling, 2017 Monagas et al., 2007 Lou et al., 2004
	Procyanidin B4	C30H26O12	578	578.142	C00002935	Peanut (Skin)	Lou et al., 2004
	Procyanidin B5	C30H26O12	578	578.142		Almond (Whole almond, skin)	Bolling, 2017 Monagas et al., 2007
	Procyanidin B7	C30H26O12	578	578.142		Almond (Whole almond, skin)	Bolling, 2017 Monagas et al., 2007
	Procyanidin C1	C45H38O18	866	866.206		Almond (Skin) Pecan (Kernel)	Jia et al., 2018 Bolling, 2017 Monagas et al., 2007
	Procyanidin oligomers (dimers-nonamers)					Almond (Skin) Peanut (Skin) Pistachio (Kernel, skin) Hazelnut (Skin) Walnut (Kernel) Pecan (Kernel)	Bodoira and Maestri, 2020 Bodoira et al., 2019 Jia et al., 2018 Pelvan et al., 2018 Bodoira et al., 2017 Regueiro et al., 2014 Fabani et al., 2013 Sarnoski et al., 2012 Del Rio et al., 2011 Monagas et al., 2007
Lignans	(–)-7-hydroxymatairesinol	C20H22O7	374	374.137		Almond (Whole almond)	Bolling, 2017
	7-hydroxysecoisolariciresinol	C20H26O7	378	378.168		Almond (Whole almond)	Bolling, 2017
	Cyclolariciresinol	C20H24O6	360	360.157		Almond (Whole almond)	Bolling, 2017
	(+)-lariciresinol	C20H24O6	360	360.157		Almond (Whole almond) Cashew nut (seed) Chestnut (seed) Hazelnut (seed) Peanut (seed) Pecan (seed) Pistachio (seed) Walnut (seed)	Rodríguez-García et al., 2019 Bolling, 2017
	(–)-matairesinol	C20H22O6	358	358.142		Almond (Whole almond) Cashew nut (seed) Chestnut (seed) Hazelnut (seed) Peanut (seed) Pecan (seed) Pistachio (seed) Walnut (seed)	Rodríguez-García et al., 2019 Bolling, 2017
	(+)-pinoresinol	C20H22O6	358	358.142		Almond (Whole almond)	Bolling, 2017
	(–)-secoisolariciresinol	C20H26O6	362	362.173		Almond (Whole almond) Cashew nut (seed) Chestnut (seed) Hazelnut (seed) Peanut (seed) Pecan (seed) Pistachio (seed) Walnut (seed)	Rodríguez-García et al., 2019 Bolling, 2017
	(+)-syringaresinol	C22H26O8	418	418.163		Almond (Whole almond)	Bolling, 2017
	(+)-sesamin	C20H18O6	354	354.11		Almond (Whole almond)	Bolling, 2017
Miscellaneous
	Catechol	C6H6O2	110	110.037		Pecan (Kernel)	Malik et al., 2009
Coumarins	Coumestrol	C15H8O5	268	268.037		Almond (Whole almond)	Bolling, 2017
	Aesculin	C15H16O9	340	340.079		Almond (Kernel)	Čolić et al., 2017
	Aesculetin	C9H6O4	178	178.027		Almond (Kernel) Japanese chestnut (Skin)	Čolić et al., 2017 Tuyen et al., 2017
	Dihydroxycoumarin					Peanut (Skin) Hazelnut (Skin)	Pelvan et al., 2018 Bodoira et al., 2017 Ma et al., 2014
	Umbelliferone (7-hydroxycoumarin)	C9H6O3	162	162.032		Chinese chestnut (Kernel)	Chang et al., 2020
